# Supplementary material for: Neurostructural subgroup in 4291 individuals with schizophrenia identified using the subtype and stage inference algorithm
Source: PubMed Central journal article supplement (PMC11252381; doi:10.1038/s41467-024-50267-3), 2024-07-17
Supplement: 41467_2024_50267_MOESM3_ESM.pdf [file 41467_2024_50267_MOESM3_ESM.pdf]

## **Description of Additional Supplementary Files**

File Name: Supplementary Movie 1

Description: The progressive pattern of spatial expansion along with later 'temporal' stages of pathological progression for the 'trajectory' 1, which displays an 'early cortical-predominant loss' biotype.

File Name: Supplementary Movie 2

Description: The progressive pattern of spatial expansion along with later 'temporal' stages of pathological progression for the 'trajectory' 2, which displays an 'early subcortical-predominant loss' biotype.
